# Supplementary material for: The ESCRT Machinery Is Recruited by the Viral BFRF1 Protein to the Nucleus-Associated Membrane for the Maturation of Epstein-Barr Virus
Source: PubMed Central journal article supplement (PMC3435242; doi:10.1371/journal.ppat.1002904), 2012-09-06
Supplement: ppat.1002904.s006.pdf [file ppat.1002904.s006.pdf]

**Table S1. Oligonucleotides primers and plasmid DNA templates used in this study.**

| Plasmid              | Deleted Region | Primer                                                                                                   | Template                        |
|----------------------|----------------|----------------------------------------------------------------------------------------------------------|---------------------------------|
| <u>HA-BFRF1</u>      |                |                                                                                                          |                                 |
| ΔLD1 (pLPT4)         | d(8-65)        | 5'-ATG GCG AGC CCG GAA GAG AGG GCC TTT AAG CTG AAG AAC TGC-3'                                            | pcDNA3.0-HA-BFRF1               |
| ΔLD2 (pLPT5)         | d(74-134)      | 5'-TAA GCT GAA GAA CTG CAA C AAA AGC CCC CTG GTC TTC C-3'                                                | pcDNA3.0-HA-BFRF1               |
| ΔID (pLPT6)          | d(135-179)     | 5'-GCC AGG ATG ACT TCA TTA AGT TC GTC ATG GAT ATG ATT AGT GAT AT-3'                                      | pcDNA3.0-HA-BFRF1               |
| ΔESR (pLPT7)         | d(180-313)     | 5'-ACG CCC AGA AGG CCT CGC GG ACA CCT TAT CTG GCA CGG GT-3'                                              | pcDNA3.0-HA-BFRF1               |
| ΔTM (pLPT8)          | d(314-336)     | 5'-TGG CGT TAT TCT TGG CGC GCC TAG AGG GCC CTA TTC TAT AGT-3'                                            | pcDNA3.0-HA-BFRF1               |
| <u>HSV-1</u>         |                |                                                                                                          |                                 |
| HA-UL34 (pLPT23)     |                | Forward 5'-GAT ATC ATG GCG GGA CTG GGC AAG-3'<br>Reverse 5'-CCG CTC GAG TTA TAG GCG CGC GCC AGC-3'       | HSV-1 infected A549 DNA extract |
| 3XFlag-UL31 (pLPT24) |                | Forward 5'-CCC AAG CTT ATG TAT GAC ACC GAC CCC C-3'<br>Reverse 5'-G GAA TTC CTA CGG CGG AGG AAA CTC G-3' | HSV-1 infected A549 DNA extract |
